# Supplementary material for: Facile formation of single crystalline Pt nanowires on a substrate utilising lyotropic liquid crystals consisting of cationic surfactants
Source: Royal Society of Chemistry journal article supplement (doi:10.1039/b901663e), 2009-01-01
Supplement: b901663e.pdf [file b901663e.pdf]

**Electronic Supplementary Information (Figure S1 to S4)**  
**Figure S1**

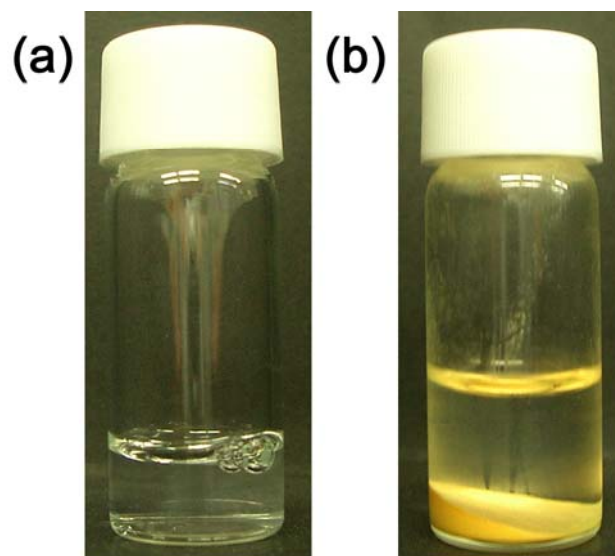

5

**Figure S1** Precursor solutions for the formation of LLC films. The each composition of the solutions 10 was 0.5 M  $\text{H}_2\text{SO}_4$ , CTAB, and either (a)  $\text{Pt}(\text{NH}_3)_4\text{Cl}_2$  or (b)  $\text{H}_2\text{PtCl}_6 \cdot 6\text{H}_2\text{O}$ .

**Figure S2**

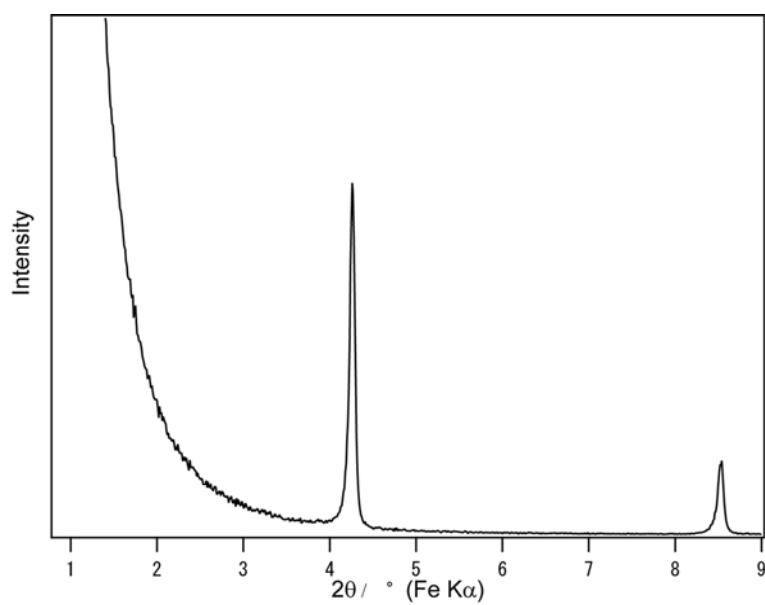

**5 Figure S2**  $\theta$ - $2\theta$  XRD pattern of the LLC film prepared from the precursor solution ( $\text{H}_2\text{O}$ , CTAB, and  $\text{Pt}(\text{NH}_3)_4\text{Cl}_2$ ).

**Figure S3**

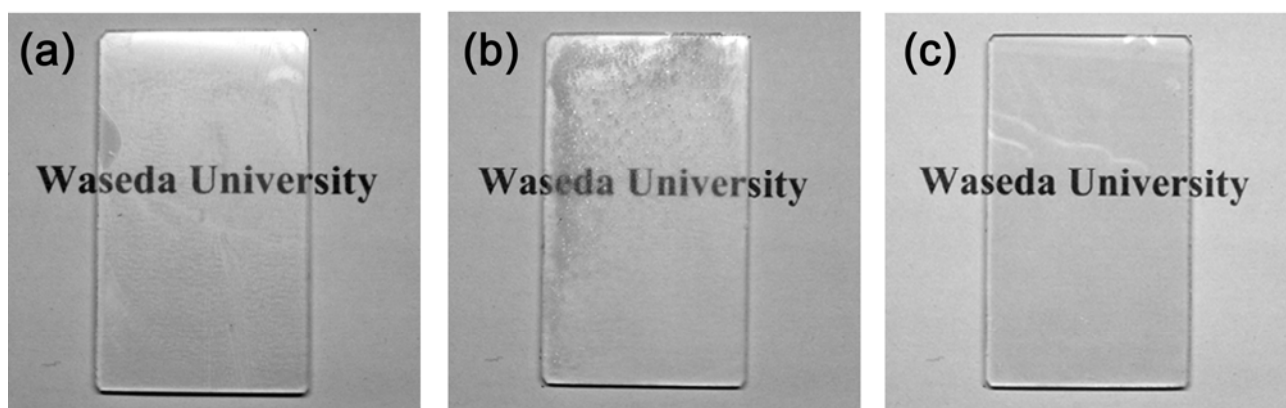

**5 Figure S3** Photographs of the glass substrates at several stages. (a) LLC film, (b) 2 days after dip-coating with the SBH solution, and (c) after washing with water. The composition of the precursor solution was  $\text{H}_2\text{O}$ , CTAB, and  $\text{Pt}(\text{NH}_3)_4\text{Cl}_2$ .

**Figure S4**

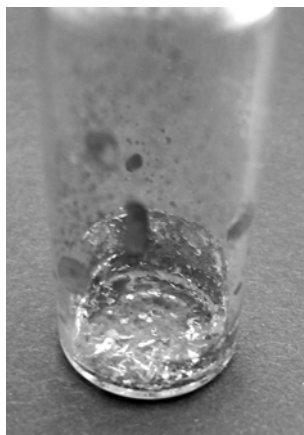

**5 Figure S4** Photograph of deposited Pt prepared in the solution phase of the precursor solution containing  $\text{H}_2\text{SO}_4$  and  $\text{Pt}(\text{NH}_3)_4\text{Cl}_2$  but without CTAB.
